# Supplementary material for: Agar Extraction By-Products from Gelidium sesquipedale as a Source of Glycerol-Galactosides
Source: PubMed Central journal article supplement (PMC6320990; doi:10.3390/molecules23123364), 2018-12-19
Supplement: molecules-23-03364-s001.pdf [file molecules-23-03364-s001.pdf]

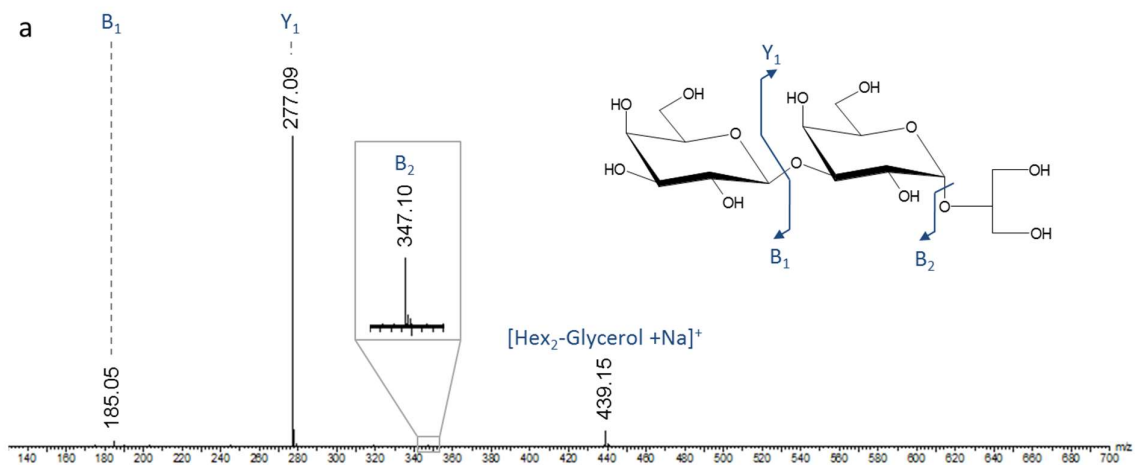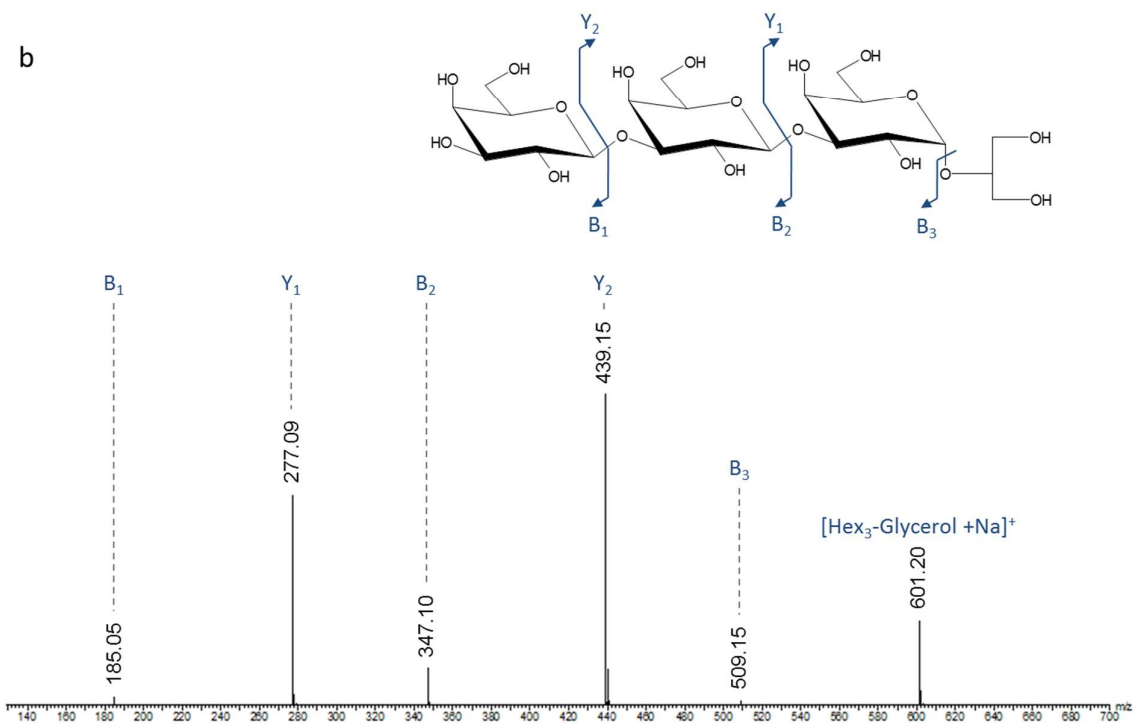

**Supplementary data 1.** ESI-MS/MS (+) spectra of the (hexose)<sub>2</sub>-glycerol (**a**) and the (hexose)<sub>3</sub>-glycerol (**b**) observed at  $m/z$  439.15 and  $m/z$  601.20 respectively.
